# Supplementary material for: Land Management Contributes significantly to observed Vegetation Browning in Syria during 2001–2018
Source: Copernicus journal article supplement (doi:10.5194/bg-19-1515-2022), 2022-03-17
Supplement: Supplementary file 1 [file bg-19-1515-2022-supplement.zip]

Archive with 2 entries (2 files):
- bg-19-1515-2022-supplement-title-page.pdf
- syr_tur.kml
