# Supplementary material for: Land Management Contributes significantly to observed Vegetation Browning in Syria during 2001–2018
Source: Copernicus journal article supplement (doi:10.5194/bg-19-1515-2022), 2022-03-17
Supplement: Supplementary file 1 [file bg-19-1515-2022-supplement.zip › bg-19-1515-2022-supplement-title-page.pdf]

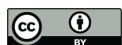

*Supplement of*

## **Land Management Contributes significantly to observed Vegetation Browning in Syria during 2001–2018**

**Tiexi Chen et al.**

*Correspondence to:* Tiexi Chen (txchen@nuist.edu.cn)

- [bg-19-1515-2022-supplement-title-page.pdf](#)
- [syr\\_tur.kml](#)

The copyright of individual parts of the supplement might differ from the article licence.
