# Supplementary material for: Land Management Contributes significantly to observed Vegetation Browning in Syria during 2001–2018
Source: Copernicus journal article supplement (doi:10.5194/bg-19-1515-2022), 2022-03-17
Supplement: Supplementary file 1 [file bg-19-1515-2022-supplement.zip › syr_tur.kml]

<?xml version="1.0" encoding="UTF-8"?>
<kml xmlns="http://www.opengis.net/kml/2.2" xmlns:gx="http://www.google.com/kml/ext/2.2" xmlns:kml="http://www.opengis.net/kml/2.2" xmlns:atom="http://www.w3.org/2005/Atom">
<Document>
	<name>syr_tur.kml</name>
	<Style id="s_ylw-pushpin_hl">
		<IconStyle>
			<scale>1.3</scale>
			<Icon>
				<href>http://maps.google.com/mapfiles/kml/pushpin/ylw-pushpin.png</href>
			</Icon>
			<hotSpot x="20" y="2" xunits="pixels" yunits="pixels"/>
		</IconStyle>
	</Style>
	<StyleMap id="m_ylw-pushpin">
		<Pair>
			<key>normal</key>
			<styleUrl>#s_ylw-pushpin</styleUrl>
		</Pair>
		<Pair>
			<key>highlight</key>
			<styleUrl>#s_ylw-pushpin_hl</styleUrl>
		</Pair>
	</StyleMap>
	<Style id="s_ylw-pushpin">
		<IconStyle>
			<scale>1.1</scale>
			<Icon>
				<href>http://maps.google.com/mapfiles/kml/pushpin/ylw-pushpin.png</href>
			</Icon>
			<hotSpot x="20" y="2" xunits="pixels" yunits="pixels"/>
		</IconStyle>
	</Style>
	<Placemark>
		<name>syr_tur</name>
		<styleUrl>#m_ylw-pushpin</styleUrl>
		<LineString>
			<tessellate>1</tessellate>
			<coordinates>
				39.50,37.25,0 40.5,37.5,0 41.,36.75,0 40.0,36.5,0 39.5,37.25,0 
			</coordinates>
		</LineString>
	</Placemark>
</Document>
</kml>
